# Supplementary material for: Feasibility of working with a wholesale supplier to co-design and test acceptability of an intervention to promote smaller portions: an uncontrolled before-and-after study in British Fish & Chip shops
Source: PubMed Central journal article supplement (PMC6377521; doi:10.1136/bmjopen-2018-023441), 2019-02-06

## Supplementary File A: Logic model

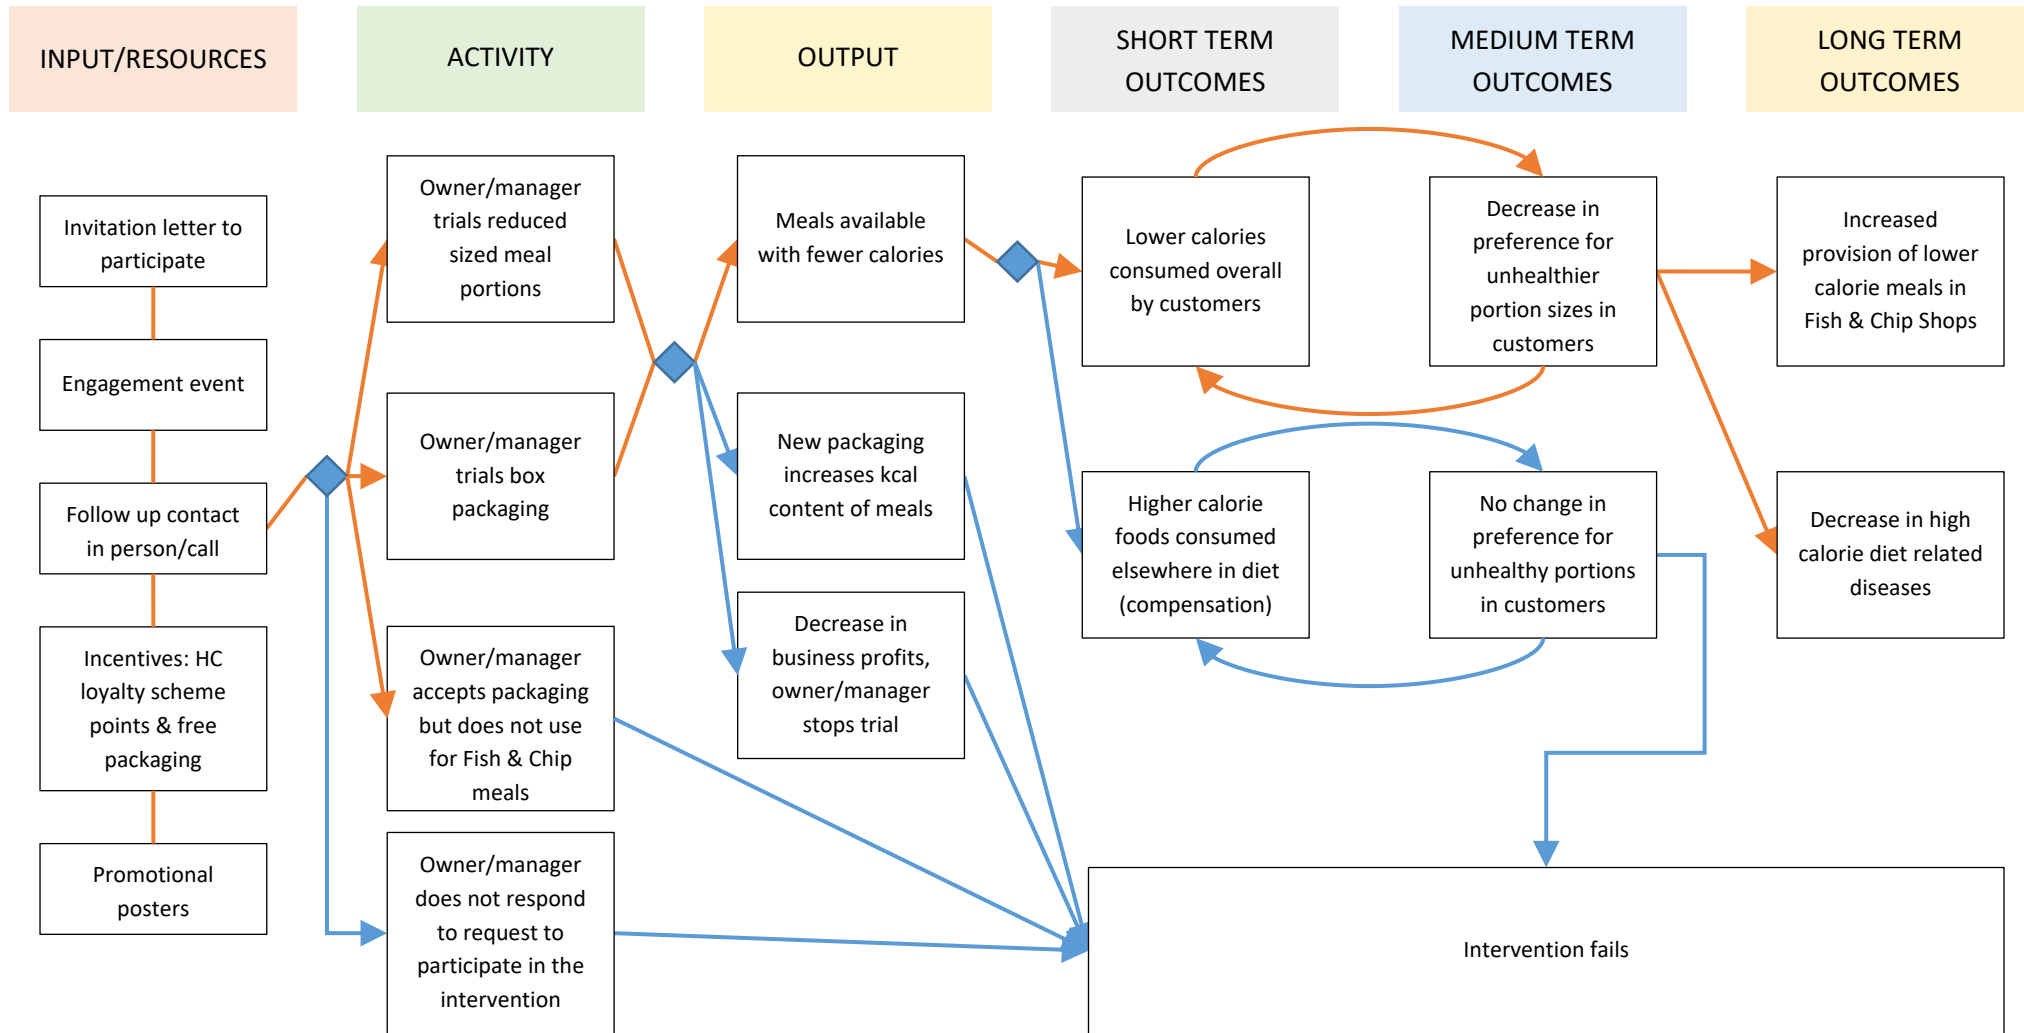

Supplement: bmjopen-2018-023441supp001.pdf [file bmjopen-2018-023441supp001.pdf]
