# Supplementary material for: Feasibility of working with a wholesale supplier to co-design and test acceptability of an intervention to promote smaller portions: an uncontrolled before-and-after study in British Fish & Chip shops
Source: PubMed Central journal article supplement (PMC6377521; doi:10.1136/bmjopen-2018-023441), 2019-02-06
Supplement: bmjopen-2018-023441supp002.pdf [file bmjopen-2018-023441supp002.pdf]

**Supplementary File B: Goal-setting form**

**Team Spirit Event, Henry Colbeck Limited,**

**Wednesday 6th April 2016**

**Business name:** \_\_\_\_\_

**Business representatives:**

Name: \_\_\_\_\_ Role: owner/ manager/ staff (circle answer)

Name: \_\_\_\_\_ Role: owner/ manager/ staff (circle answer)

**From the topics covered at this Team Spirit event; what are the things you could change in your business?**

|                                                                           | 1. Could your business make this change? (Y/N) | 2. Are you willing to try this change? (Y/N) |
|---------------------------------------------------------------------------|------------------------------------------------|----------------------------------------------|
| <b>Change to structured packaging:</b><br><i>e.g. introduce bio boxes</i> |                                                |                                              |
| <b>Make smaller portions available to your customers at all times</b>     |                                                |                                              |

**Public Pledge: Detail what, which and when you will change**

| <b>What to change?</b><br><i>Structured packaging<br/>/Smaller portions</i> | <b>Which packaging will you use for which change?</b><br><i>Single compartment corrugated cardboard box/Double compartment corrugated cardboard box/Bio box/MK</i> | <b>When will you do it?</b><br><i>Date</i> | <b>How sure (confident) are you that your business can achieve this?</b><br><i>From 1-5 (1=not at all sure; 5= very sure)*</i> |
|-----------------------------------------------------------------------------|--------------------------------------------------------------------------------------------------------------------------------------------------------------------|--------------------------------------------|--------------------------------------------------------------------------------------------------------------------------------|
| 1.                                                                          |                                                                                                                                                                    |                                            |                                                                                                                                |
| 2.                                                                          |                                                                                                                                                                    |                                            |                                                                                                                                |

\*1= not at all sure; 2= not very sure; 3= neither; 4= somewhat sure; 5= very sure

I give consent to be contacted both, by phone, or in person by Newcastle University to provide them with details of the:

- Packaging changes I have made (if any)
- The number of Fish & Chips portions (all sizes) sold before and after the project
- My comments and opinions of the Team Spirit event
- My comment and opinions of any changes I have made following the event

Additionally, I will allow Newcastle University to speak with a few of my customers to hear their thoughts.

Signed \_\_\_\_\_ Print Name \_\_\_\_\_

Phone Number (and best time to call) \_\_\_\_\_

**Packaging key:**

- Corrugated cardboard boxes are available in either single or double compartment versions. The double compartment boxes provides separate compartments for each of the Fish & Chip meal components.
- The Bio box packaging are a single compartment box constructed from biodegradable material extracted from sugar cane.
- MK packaging are a single compartment box constructed of non-corrugated food grade cardboard.
